# Supplementary material for: Ultraprocessed Food Consumption and Obesity Development in Canadian Children
Source: PubMed Central journal article supplement (PMC11786234; doi:10.1001/jamanetworkopen.2024.57341), 2025-01-31
Supplement: jamanetwopen-e2457341-s002.pdf [file jamanetwopen-e2457341-s002.pdf]

## Data Sharing Statement

Chen. Ultraprocessed Food Consumption and Obesity Development in Canadian Children. *JAMA Netw Open*. Published January 31, 2025. doi:10.1001/jamanetworkopen.2024.57341

### Data

**Data available:** Yes

**Data types:** Other (please specify)

**Additional Information:** Data described in the manuscript and analytic code will be made available upon request pending approval from CHILD's Access and Publication Committee and the CHILD Study National Coordinating Centre.

**How to access data:** A list of variables available in the CHILD Cohort Study is available at <https://childstudy.ca/for-researchers/study-data/>. More information about data access for the CHILD Cohort Study can be found at <https://childstudy.ca/for-researchers/data-access/>.

**When available:** With publication

### Supporting Documents

**Document types:** None

### Additional Information

**Who can access the data:** Data described in the manuscript and analytic code will be made available upon request pending approval from CHILD's Access and Publication Committee and the CHILD Study National Coordinating Centre.

**Types of analyses:** Researchers interested in collaborating on a project and accessing CHILD Cohort Study data should contact the Study's National Coordinating Centre (NCC) to discuss their needs before initiating a formal request. To contact the NCC, please email [child@mcmaster.ca](mailto:child@mcmaster.ca).

**Mechanisms of data availability:** Researchers interested in collaborating on a project with us ([kozeta.miliku@utoronto.ca](mailto:kozeta.miliku@utoronto.ca)) and accessing CHILD Cohort Study data should contact the Study's National Coordinating Centre (NCC) to discuss their needs before initiating a formal request. To contact the NCC, please email [child@mcmaster.ca](mailto:child@mcmaster.ca).
